# Supplementary material for: Decrease in 230 Th in the Amundsen Basin since 2007: far-field effect of increased scavenging on the shelf?
Source: Copernicus journal article supplement (doi:10.5194/os-16-221-2020), 2020-02-14
Supplement: Supplementary file 1 [file os-16-221-2020-supplement.pdf]

Supplement of Ocean Sci., 16, 221–234, 2020  
<https://doi.org/10.5194/os-16-221-2020-supplement>  
© Author(s) 2020. This work is distributed under  
the Creative Commons Attribution 4.0 License.

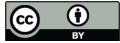

*Supplement of*

**Decrease in  $^{230}\text{Th}$  in the Amundsen Basin since 2007: far-field effect of increased scavenging on the shelf?**

**Ole Valk et al.**

*Correspondence to:* Ole Valk ([ole.valk@awi.de](mailto:ole.valk@awi.de))

The copyright of individual parts of the supplement might differ from the CC BY 4.0 License.

## Dissolved

| Year | Cruise | Station | Lat.   | Long.   | Depth [m] | 230Thd [fg/kg] | error | 232Thd [pmol/kg] | error |
|------|--------|---------|--------|---------|-----------|----------------|-------|------------------|-------|
| 2015 | PS94   | 81      | 88.990 | 61.063  | 50        | 3.11           | 0.16  | 114.20           | 1.61  |
| 2015 | PS94   | 81      | 88.990 | 61.063  | 100       | 4.13           | 0.15  | 50.82            | 0.42  |
| 2015 | PS94   | 81      | 88.990 | 61.063  | 200       | 3.25           | 0.16  | 73.37            | 1.13  |
| 2015 | PS94   | 81      | 88.990 | 61.063  | 300       | 4.42           | 0.23  | 53.05            | 1.42  |
| 2015 | PS94   | 81      | 88.990 | 61.063  | 500       | 5.19           | 0.20  | 46.53            | 0.77  |
| 2015 | PS94   | 81      | 88.990 | 61.063  | 1000      | 3.61           | 0.15  | 31.50            | 0.35  |
| 2015 | PS94   | 81      | 88.990 | 61.063  | 1500      | 5.14           | 0.31  | 31.32            | 1.18  |
| 2015 | PS94   | 81      | 88.990 | 61.063  | 2000      | 5.55           | 0.18  | 30.66            | 0.37  |
| 2015 | PS94   | 81      | 88.990 | 61.063  | 2000      | 5.78           | 0.19  | 54.08            | 0.69  |
| 2015 | PS94   | 81      | 88.990 | 61.063  | 2500      | 7.10           | 0.23  | 31.09            | 0.50  |
| 2015 | PS94   | 81      | 88.990 | 61.063  | 2500      | 6.96           | 0.21  | 34.75            | 0.51  |
| 2015 | PS94   | 81      | 88.990 | 61.063  | 3000      | 7.64           | 0.28  | 31.63            | 0.68  |
| 2015 | PS94   | 81      | 88.990 | 61.063  | 3500      | 10.13          | 0.26  | 47.46            | 0.70  |
| 2015 | PS94   | 81      | 88.990 | 61.063  | 4000      | 10.34          | 0.46  | 29.65            | 1.00  |
| 2015 | PS94   | 81      | 88.990 | 61.063  | 4335      | 10.90          | 0.21  | 43.95            | 0.38  |
| 2015 | PS94   | 117     | 84.560 | 115.996 | 10        | 0.91           | 0.13  | 99.23            | 1.63  |
| 2015 | PS94   | 117     | 84.560 | 115.996 | 50        | 2.27           | 0.15  | 131.72           | 2.17  |
| 2015 | PS94   | 117     | 84.560 | 115.996 | 100       | 2.60           | 0.15  | 63.28            | 0.96  |
| 2015 | PS94   | 117     | 84.560 | 115.996 | 200       | 3.10           | 0.16  | 53.56            | 0.79  |
| 2015 | PS94   | 117     | 84.560 | 115.996 | 300       | 4.10           | 0.17  | 67.93            | 0.91  |
| 2015 | PS94   | 117     | 84.560 | 115.996 | 500       | 5.42           | 0.20  | 65.40            | 1.01  |
| 2015 | PS94   | 117     | 84.560 | 115.996 | 1000      | 4.56           | 0.17  | 34.96            | 0.43  |
| 2015 | PS94   | 117     | 84.560 | 115.996 | 1500      | 6.31           | 0.23  | 46.72            | 0.86  |
| 2015 | PS94   | 117     | 84.560 | 115.996 | 2000      | 8.24           | 0.25  | 56.72            | 0.95  |
| 2015 | PS94   | 117     | 84.560 | 115.996 | 2500      | 8.90           | 0.27  | 33.44            | 0.59  |
| 2015 | PS94   | 117     | 84.560 | 115.996 | 3000      | 8.81           | 0.26  | 21.81            | 0.36  |
| 2015 | PS94   | 117     | 84.560 | 115.996 | 3500      | 8.43           | 0.25  | 21.69            | 0.36  |
| 2015 | PS94   | 117     | 84.560 | 115.996 | 4000      | 10.03          | 0.26  | 28.58            | 0.41  |
| 2015 | PS94   | 117     | 84.560 | 115.996 | 4303      | 10.44          | 0.28  | 45.41            | 0.72  |
| 2015 | PS94   | 117     | 84.560 | 115.996 | 4353      | 10.07          | 0.25  | 34.80            | 0.46  |
| 2015 | PS94   | 125     | 85.098 | 139.625 | 10        | 2.78           | 0.18  | 207.85           | 4.63  |
| 2015 | PS94   | 125     | 85.098 | 139.625 | 100       | 2.00           | 0.16  | 70.92            | 1.54  |
| 2015 | PS94   | 125     | 85.098 | 139.625 | 200       | 2.35           | 0.16  | 57.45            | 1.11  |
| 2015 | PS94   | 125     | 85.098 | 139.625 | 300       | 2.84           | 0.17  | 51.27            | 0.97  |
| 2015 | PS94   | 125     | 85.098 | 139.625 | 500       | 2.55           | 0.16  | 41.26            | 0.83  |
| 2015 | PS94   | 125     | 85.098 | 139.625 | 1000      | 2.33           | 0.14  | 26.57            | 0.25  |
| 2015 | PS94   | 125     | 85.098 | 139.625 | 2000      | 6.80           | 0.22  | 29.58            | 0.48  |
| 2015 | PS94   | 125     | 85.098 | 139.625 | 2500      | 6.40           | 0.37  | 28.75            | 1.15  |
| 2015 | PS94   | 125     | 85.098 | 139.625 | 3000      | 6.15           | 0.21  | 26.62            | 0.41  |
| 2015 | PS94   | 125     | 85.098 | 139.625 | 3500      | 7.21           | 0.18  | 28.16            | 0.25  |
| 2015 | PS94   | 125     | 85.098 | 139.625 | 3788.1    | 8.21           | 0.23  | 25.15            | 0.36  |
| 2015 | PS94   | 125     | 85.098 | 139.625 | 3838      | 8.23           | 0.17  | 24.61            | 0.19  |
| 2015 | PS94   | 134     | 84.844 | 159.035 | 300       | 3.90           | 0.17  | 63.31            | 0.96  |
| 2015 | PS94   | 134     | 84.844 | 159.035 | 1000      | 9.79           | 0.27  | 40.54            | 0.63  |
| 2015 | PS94   | 134     | 84.844 | 159.035 | 2000      | 17.74          | 0.32  | 46.41            | 0.53  |
| 2015 | PS94   | 134     | 84.844 | 159.035 | 2500      | 16.89          | 0.47  | 31.30            | 0.66  |
| 2015 | PS94   | 134     | 84.844 | 159.035 | 3000      | 20.64          | 0.61  | 25.60            | 0.62  |
| 2015 | PS94   | 134     | 84.844 | 159.035 | 3000      | 21.18          | 0.49  | 37.15            | 0.67  |

## Dissolved (continued)

| Year | Cruise | Station | Lat.   | Long.   | Depth [m] | 230Thd [fg/kg] | error | 232Thd [pmol/kg] | error |
|------|--------|---------|--------|---------|-----------|----------------|-------|------------------|-------|
| 2015 | PS94   | 134     | 84.844 | 159.035 | 3040      | 21.50          | 0.54  | 0.28             | 0.01  |
| 2015 | PS94   | 134     | 84.844 | 159.035 | 3090      | 20.98          | 0.49  | 0.36             | 0.01  |
| 2015 | PS94   | 96      | 88.338 | 124.328 | 10        | 2.60           | 0.14  | 239.34           | 2.69  |
| 2015 | PS94   | 96      | 88.338 | 124.328 | 50        | 2.14           | 0.15  | 114.19           | 1.69  |
| 2015 | PS94   | 96      | 88.338 | 124.328 | 100       | 2.54           | 0.15  | 77.69            | 1.05  |
| 2015 | PS94   | 96      | 88.338 | 124.328 | 200       | 4.61           | 0.18  | 62.30            | 0.92  |
| 2015 | PS94   | 96      | 88.338 | 124.328 | 300       | 6.91           | 0.17  | 117.90           | 0.97  |
| 2015 | PS94   | 96      | 88.338 | 124.328 | 1000      | 14.12          | 0.32  | 161.57           | 2.36  |
| 2015 | PS94   | 96      | 88.338 | 124.328 | 1500      | 16.32          | 0.24  | 34.55            | 0.26  |
| 2015 | PS94   | 96      | 88.338 | 124.328 | 2000      | 15.41          | 0.31  | 155.79           | 1.96  |
| 2015 | PS94   | 96      | 88.338 | 124.328 | 2500      | 16.14          | 0.25  | 21.40            | 0.19  |
| 2015 | PS94   | 96      | 88.338 | 124.328 | 3000      | 22.89          | 0.46  | 23.77            | 0.36  |
| 2015 | PS94   | 96      | 88.338 | 124.328 | 3250      | 23.71          | 0.42  | 18.45            | 0.24  |
| 2015 | PS94   | 96      | 88.338 | 124.328 | 3495      | 19.39          | 0.40  | 36.39            | 0.54  |
| 2015 | PS94   | 96      | 88.338 | 124.328 | 3545      | 25.29          | 0.66  | 56.75            | 0.74  |
| 2015 | PS94   | 101     | 87.499 | 179.934 | 23        | 0.18           | 0.13  | 132.05           | 2.17  |
| 2015 | PS94   | 101     | 87.499 | 179.934 | 55        | 1.50           | 0.17  | 184.89           | 3.05  |
| 2015 | PS94   | 101     | 87.499 | 179.934 | 99        | 0.57           | 0.14  | 81.02            | 1.23  |
| 2015 | PS94   | 101     | 87.499 | 179.934 | 174       | 4.04           | 0.27  | 66.32            | 0.98  |
| 2015 | PS94   | 101     | 87.499 | 179.934 | 259       | 4.27           | 0.19  | 67.70            | 0.90  |
| 2015 | PS94   | 101     | 87.499 | 179.934 | 499       | 5.61           | 0.20  | 53.30            | 0.83  |
| 2015 | PS94   | 101     | 87.499 | 179.934 | 999       | 11.79          | 0.31  | 39.74            | 0.49  |
| 2015 | PS94   | 101     | 87.499 | 179.934 | 1399      | 17.24          | 0.35  | 17.23            | 0.32  |
| 2015 | PS94   | 101     | 87.499 | 179.934 | 1899      | 23.16          | 0.46  | 31.99            | 0.54  |
| 2015 | PS94   | 101     | 87.499 | 179.934 | 2399      | 19.96          | 0.43  | 11.80            | 0.21  |
| 2015 | PS94   | 101     | 87.499 | 179.934 | 2899      | 25.60          | 0.47  | 143.24           | 2.39  |
| 2015 | PS94   | 101     | 87.499 | 179.934 | 3399      | 28.47          | 0.63  | 25.17            | 0.41  |
| 2015 | PS94   | 101     | 87.499 | 179.934 | 3881.4    | 32.53          | 0.69  | 28.93            | 0.42  |
| 2007 | PS70   | 309     | 87.046 | 104.787 | 50        | 5.69           | 0.00  | 130.34           | 0.38  |
| 2007 | PS70   | 309     | 87.046 | 104.787 | 200       | 6.69           | 0.00  | 56.09            | 0.22  |
| 2007 | PS70   | 309     | 87.046 | 104.787 | 1000      | 8.52           | 0.01  | 32.36            | 0.09  |
| 2007 | PS70   | 309     | 87.046 | 104.787 | 2000      | 11.38          | 0.00  | 32.39            | 0.11  |
| 2007 | PS70   | 309     | 87.046 | 104.787 | 2000      | 11.53          | 0.01  | 33.07            | 0.10  |
| 2007 | PS70   | 309     | 87.046 | 104.787 | 2750      | 10.57          | 0.01  | 21.69            | 0.07  |
| 2007 | PS70   | 309     | 87.046 | 104.787 | 4500      | 14.57          | 0.01  | 41.14            | 0.12  |
| 2007 | PS70   | 328     | 87.830 | 170.568 | 50        | 5.64           | 0.01  | 246.29           | 0.86  |
| 2007 | PS70   | 328     | 87.830 | 170.568 | 300       | 10.36          | 0.00  | 57.57            | 0.19  |
| 2007 | PS70   | 328     | 87.830 | 170.568 | 1000      | 15.92          | 0.01  | 38.79            | 0.12  |
| 2007 | PS70   | 328     | 87.830 | 170.568 | 1000      | 15.98          | 0.01  | 39.22            | 0.11  |
| 2007 | PS70   | 328     | 87.830 | 170.568 | 3000      | 26.61          | 0.01  | 22.15            | 0.08  |
| 2007 | PS70   | 328     | 87.830 | 170.568 | 3750      | 23.00          | 0.01  | 27.30            | 0.07  |
| 2007 | PS70   | 400     | 77.368 | 123.418 | 50        | 3.89           | 0.00  | 30.65            | 0.15  |
| 2007 | PS70   | 400     | 77.368 | 123.418 | 100       | 4.59           | 0.01  | 39.42            | 0.16  |
| 2007 | PS70   | 400     | 77.368 | 123.418 | 300       | 5.42           | 0.00  | 39.91            | 0.15  |
| 2007 | PS70   | 400     | 77.368 | 123.418 | 500       | 5.58           | 0.00  | 29.10            | 0.11  |
| 2007 | PS70   | 400     | 77.368 | 123.418 | 1150      | 5.38           | 0.00  | 27.24            | 0.20  |

**Particulate**

| Year | Cruise | Station | Depth [m] | 234Thp % from total 234Th |
|------|--------|---------|-----------|---------------------------|
| 2015 | PS94   | 81      | 50        | 1.93                      |
| 2015 | PS94   | 81      | 100       | 2.76                      |
| 2015 | PS94   | 81      | 500       | 1.49                      |
| 2015 | PS94   | 81      | 1000      | 2.66                      |
| 2015 | PS94   | 81      | 1500      | 4.12                      |
| 2015 | PS94   | 81      | 2000      | 1.36                      |
| 2015 | PS94   | 81      | 2500      | 3.29                      |
| 2015 | PS94   | 81      | 3000      | 3.02                      |
| 2015 | PS94   | 81      | 3500      | 3.46                      |
| 2015 | PS94   | 81      | 4000      | 5.89                      |
| 2015 | PS94   | 81      | 4165      | 4.51                      |
| 2015 | PS94   | 117     | 50        | 12.74                     |
| 2015 | PS94   | 117     | 300       | 5.17                      |
| 2015 | PS94   | 117     | 500       | 3.88                      |
| 2015 | PS94   | 117     | 1000      | 3.12                      |
| 2015 | PS94   | 117     | 1500      | 3.44                      |
| 2015 | PS94   | 117     | 2000      | 2.65                      |
| 2015 | PS94   | 117     | 2500      | 3.22                      |
| 2015 | PS94   | 117     | 3000      | 4.89                      |
| 2015 | PS94   | 117     | 3500      | 4.37                      |
| 2015 | PS94   | 117     | 3750      | 2.85                      |
| 2015 | PS94   | 117     | 4140      | 3.62                      |
| 2015 | PS94   | 125     | 50        | 10.57                     |
| 2015 | PS94   | 125     | 100       | 6.25                      |
| 2015 | PS94   | 125     | 300       | 7.23                      |
| 2015 | PS94   | 125     | 500       | 2.58                      |
| 2015 | PS94   | 125     | 1500      | 6.42                      |
| 2015 | PS94   | 125     | 2000      | 4.36                      |
| 2015 | PS94   | 125     | 2500      | 6.29                      |
| 2015 | PS94   | 125     | 3000      | 5.84                      |
| 2015 | PS94   | 125     | 3500      | 5.51                      |
| 2015 | PS94   | 125     | 3750      | 6.83                      |
| 2015 | PS94   | 125     | 3765      | 3.36                      |
